# Supplementary material
Source: Springer Nature journal article supplement (https://www.springermedizin.de/resource/supplementary/13063_2013_1387_MOESM3_ESM.pdf/9619918)

# Number of Peer Mentors Trained

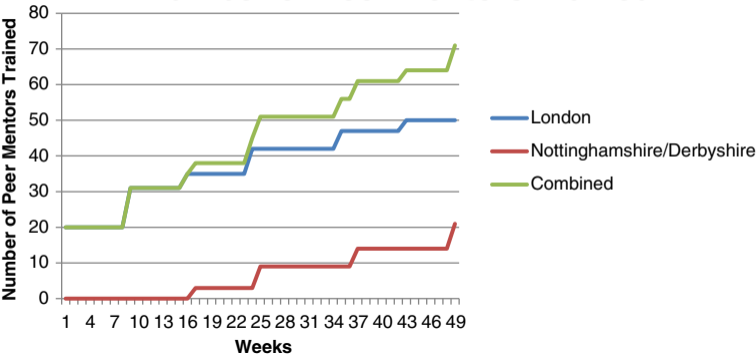

Supplement: MOESM3 [file 9619918]
